# Supplementary material for: Title: A think-aloud study exploring the experience of reading a Psychoeducational comic in young adult students
Source: Research Square preprint supplement (doi:10.21203/rs.3.rs-6959733/v1), 2025-10-28
Supplement: Supplementary file 1 [file 0c2ef4e93dd4d1ef14033ac7.docx]

**Supplementary material 1 (S1):** Brief follow-up interview schedule

1. How do you feel after reading the comic?

2. How would you describe your experience of reading the comic?

- Probe (if not enough information) - tell me more

3. What did you think of the graphics?

- Probe (if not enough information) - tell me more

4. What did you think of the story content?

- Probe (if not enough information) - tell me more

5. Do you think you learned anything about what mental health struggles might feel like?

- Probe – (If Yes) What did you learn?

6. Is there anything you think should have been included but wasn’t or could have been done differently?

- Probe – What did you think of the comic structure and length?

7. Based on your experience of reading the comic, what do you think of the use of comics as a way of helping support people to understand mental health difficulties?

- Probe (if not enough information) - tell me more
