# Supplementary material for: Title: A think-aloud study exploring the experience of reading a Psychoeducational comic in young adult students
Source: Research Square preprint supplement (doi:10.21203/rs.3.rs-6959733/v1), 2025-10-28
Supplement: Supplementary file 2 [file fe4b1d1993d947f85ab0629d.docx]

**Supplementary material 2 (S2): Coding tree with analytic codes and supplementary quotes (minimal data set)**

| Theme 1 (Emotional Resonance); Subtheme 1.1 (Narrative Empathy) | |  |
| --- | --- | --- |
| *Participant ID* | **Supplementary quotations** | **Code** |
| *p1* | ‘I feel quite relieved for the characters—coming together towards the end here, em, you know, helping each other through problems' | Empathising with character(s) |
|  |  |  |
| *p2* | ‘I guess what's worrying me now is that this—the, the boy in the comic might—like the highs aren't always forever' | Empathising with character(s) |
|  |  |  |
| *p4* | ‘I feel really happy that you know initially he started off being so depressed, but he found a way to manage it by the end' | Empathising with character(s) |
|  |  |  |
| *p6* | ‘you can kinda see that you know he's tired, he's kind of lost interest in the things that he would have been interested in before...he kind of you know has slumped into that kind of whole state of maybe depression and anxiety' | Empathising with character(s) |
|  |  |  |
| *p7* | ‘It does make me feel a bit sad reading this, but not just because it's a character that, you know, obviously has things, to put it generally, going on, but also 'cause...it's really easy to relate and see yourself' | Empathising with character(s) |
|  |  |  |
| *p7* | ‘The scene where he picks up a knife, I felt a bit of like terror' | Empathising with character(s) |
|  |  |  |
| *p8* | ‘when he finds the rope I'm kind of worried for him' | Empathising with character(s) |
|  |  |  |
| *p8* | ‘I'm starting to feel hopeful for him as well…'cause he's been able to help someone and you're starting to think well, maybe he won't be alone anymore, 'cause he's met someone that could help him, maybe' | Empathising with character(s) |
|  |  |  |
| *p8* | ‘I definitely think by the end of that page, you’re feeling rather happy—where he's kind of walking with the balloons and it's em, it’s interesting 'cause it's the first time I've, I've seen him like drawn smiling so it kinda makes you wanna smile as well, you're feeling happier for him that he's actually got like a smile on his face.' | Empathising with character(s) |
|  |  |  |
| *p9* | ‘I felt bad for him at times because he seemed to have like a lot of negative thoughts going through his head.' | Empathising with character(s) |
|  |  |  |
| *p10* | ‘And so it’s like—the bottom of the page where he’s cutting open the bag of fear, I think, like just what he's saying, the kind of the method he’s taking is just quite—I kind of wanna say endearing and you kind of feel like oh yeah, like you’ve got this, come on!' | Empathising with character(s) |
|  |  |  |
| *p11* | ‘I feel really bad for him…he's actually asking for help now and people are ignoring him' | Empathising with character(s) |
|  |  |  |
| *p13* | ‘I feel sorry for the character 'cause he's feeling down  but he’s em he’s invalidating his own feelings by saying that "*other people have real reasons to feel miserable".'* | Empathising with character(s) |
|  |  |  |
| *p14* | ‘So here it looks like the character is being faced, sort of with his inner voice or inner demons. It's making me sad and sympathising with them because it can be very difficult dealing with the inner voice without sort of any interjection. And when you're listening to that alone, it seems like the loudest voice.' | Empathising with character(s) |
|  |  |  |
| *p14* | ‘it makes me sad that Sam thinks he can end things and no one would care' | Empathising with character(s) |
|  |  |  |
| *p16* | ‘You feel bad for him when he's talking about feeling trapped' | Empathising with character(s) |
|  |  |  |
| *p16* | ‘And you feel very sympathetic for him when he says that you stay there even though it's not where you want to be' | Empathising with character(s) |
|  |  |  |
| *p16* | ‘On one hand, you feel, you feel sad for him, the fact that he's, he’s made the effort to come back out of the pit and then the wee anxiety weight comes along, but you also feel really happy for him that he's, he's at a point where he's actually able to ask for help, 'cause it's like although, although he’s obviously been through a lot already, he's got better em like coping mechanisms then, if he’s, if he's approaching other people.' | Empathising with character(s) |
| *p17* | ‘I could really emphasise with the, with the character at the place where he found a knife.' | Empathising with character(s) |
|  |  |  |
| *p19* | ‘And I can understand about this masks wearing off thing as well, because sometimes like when, when a person is too tired or too exhausted because of like the daily hectic routine then sometimes it’s too hard to put on a fake smile.' | Empathising with character(s) |
|  |  |  |
| *p20* | ‘And then at the very bottom of the page, like just looking at the picture of him you can kinda see in his eyes he’s looking sad, again it makes me feel kind of empathy towards him.' | Empathising with character(s) |
|  |  |  |
| *p20* | ‘And the image of the knife kinda makes me feel on edge 'cause I don't know what he's gonna do' | Empathising with character(s) |
|  |  |  |
| *p21* | ‘I think it's scary that all these thoughts kind of really come on involuntarily you know?' | Empathising with character(s) |
|  |  |  |
| *p22* | ‘That feeling of like...you know when one thing’s wrong, everything's wrong, you know, and it does feel overwhelming, you know, rather than kind of dealing with one thing at a time. It's very easy to kind of just think everything’s hopeless because one thing's gone wrong.' | Empathising with character(s) |
|  |  |  |
| *p23* | ‘Oh dear, I see there's a knife in the corner. Okay em, "*Is this it, a way to cope?"*, um I hope not, I hope he doesn't do anything like that.' | Empathising with character(s) |

| Theme 1 (Emotional Resonance); Subtheme 1.2 (The primacy of graphics in facilitating an empathic connection) | | |
| --- | --- | --- |
| *Participant ID* | **Supplementary quotations** | **Code** |
| *P1* | It's hard to imagine other people's experiences and how that might feel, but I think the comic portrayed the emotion of that and the kind of the loneliness of it very well.' | Conveys accurate MH journey |
|  |  |  |
| *p2* | It is definitely terror now that you're sort of feeling, sort of like even this with like the illustrations as well it's all very like fast paced and you can sort of feel the movement' | Graphics portray emotions |
|  |  |  |
| *p3* | ‘they [the graphics] make—you know they, they make a very good space in the mind. Create a space for the reader to have a better feeling, you know, have a better feeling of this whole story.’ | Graphics portray emotions |
|  |  |  |
| *p4* | ‘Oh no!...he's, he's got the knife!...he doesn’t, he doesn’t use it for self-harm, that’s good’ | Empathising with character; effective imagery symbolism |
|  |  |  |
| *p5* | ‘You can control emotions through it by using the background colours, which I see there's a certain amount of here. Em yeah, it's I think it's an excellent medium, it's a very artistic medium and I absolutely love it.' | Effective imagery symbolism |
|  |  |  |
| *p6* | ‘I definitely feel like you know within the last few months, like during this year, like the whole visualisation of like you know…the sacks being on…it kinda does represent like you know how, you know, you do find it hard to get up' | Visual metaphor evokes empathy |
|  |  |  |
| *p6* | ‘The vivid representation of like you know, potentially resorting to self-harm or suicide like, no it's very striking but at the same time, it's maybe sadly also you know the reality of how things sometimes are whenever you know it really does get to that point at times. And like it's kind of those images that do kind of hit home' | Effective imagery symbolism; Inclusion of dark side of mental health important |
|  |  |  |
| *p7* | ‘The despair frame makes me feel really sad...I mean it's, it's a graphic, but just having them like lay there, under what, what like a pillow or, or something like that, it's just, yeah it’s just sad' | Visual metaphor evokes empathy |
|  |  |  |
| *p8* | ‘It's interesting how you got the picture…where it changes from his face to the skull…I would say you feel almost helpless just like he in the pictures is feeling because em you can't exactly help…it's another one of those where he's looking directly at you, and then the skull is also looking directly at you so you feel almost like him and as helpless as he is' | Effective imagery symbolism; empathising with character |
|  |  |  |
| *p8* | ‘I see the contrast with the colours, it makes you realise that he's—the character’s going back into this kind of dark place. You’re feeling sorry for him again…but I still think there's like you still—well, I still think, I still have a little bit of hope for him 'cause in the top of all of those pictures there are little bits of the balloons’ | Effective imagery symbolism; empathising with character |
|  |  |  |
| *p10* | ‘Oh the analogy about having like weight on your shoulders…it's quite powerful' | Visual metaphor evokes empathy |
|  |  |  |
| *p10* | ‘it's heavy in terms of just this topic or this kind of thing in general and some of the bits…where he's got the weight on him, you almost, you almost feel that weight just of this kind of topic' | Visual metaphor evokes empathy |
|  |  |  |
| *p11* | ‘I found myself em like smiling whenever it was the *"Self-belief"* balloon, whenever he was reaching up to put the key in' | Empathising with character; Effective imagery symbolism |
|  |  |  |
| *p14* | ‘So here where Sam is literally weighed down by *"Despair"* and in this dark place which is very obviously depicted by the dark character. I feel sad for Sam, because it's very easy to get trapped in that place' | Visual metaphor evokes empathy; Empathising with character |
|  |  |  |
| *p15* | ‘I think the visual—the visuals of the man in the mask and also like the bags...really kind of hammers home what it feels like and em in like a very accessible way...it actually brings on a lot of emotions throughout as well as kind of empathising with, what it feels like to be depressed or anxious.' | Visual metaphors evoke empathy; Empathising with character |
|  |  |  |
| *p16* | ‘with the visuals...it sort of just lets you process in such a way that words can’t...you know people say you, you feel lighter and it’s a weight off your shoulders and the wee phrases that you hear when you think of mental health, but it was, it was really interesting to see how they actually represented that' | Visual metaphors evoke empathy |
|  |  |  |
| *p20* | ‘And again all the like trees talking to him you can kind of feel like—experience how overwhelmed he must be. And his hands on his head again, just shows me he is.' | Graphics portray emotions |
|  |  |  |
| *p20* | ‘I think they [the graphics] were pretty good. Some of them looked quite scary…I think they really like directed what he was feeling, especially in the boy's face. So I think they were pretty good at showing the actual words he was saying' | Graphics portray emotions; Combination of visuals and narrative |
|  |  |  |
| *P21* | ‘it being in a comic form makes it feel a lot more real than just maybe reading without pictures. Like it helps like visualising the entire process.’ | Visuals convey experience |
|  |  |  |
| *p22* | ‘the illustrator definitely captures you know his face and you know kind of torment in his face whenever you know he's upset.' | Graphics portray emotions |
|  |  |  |

| Theme 2 (Connection to Self) | | |
| --- | --- | --- |
| *Participant ID* | **Supplementary quotations** | **Code** |
|  |  |  |
| *p1* | ‘It's a familiar story I'm sure a lot of people can kind of relate to' | Relatable |
|  |  |  |
| *p2* | ‘I think that's quite relatable where he says that he knows that he should be feeling okay, but he just feels down in general' | Relatable |
|  |  |  |
| *p2* | ‘The message he receives from 'twaddle' the social media…I guess that's quite relatable…you can just look at social media where it's just everyone's best parts' | Relatable |
|  |  |  |
| *p2* | ‘I feel like it was very relatable em in terms of relating it to my life and friend’s lives' | Relatable |
|  |  |  |
| *p3* | ‘Happens to all of us. All of us will have our darkest hours and, and it, and it will—it might happen, it might happen anytime.' | Relatable |
|  |  |  |
| *P4* | ‘Aw that's relatable em, the part on the second page where he says, "Do you ever find yourself replaying things [something] over and over again in your head [mind]?", I think that's really relatable.' | Relatable |
|  |  |  |
| *p4* | ‘I think we've all been in—like we've all experienced this kind of period at some time in our lives, when you—you're just so down and you just feel like no one understands.' | Relatable |
|  |  |  |
| *p5* | ‘The eh main character is your, your standard—I’m not actually quite sure what age he is, but it's, uh, he's relatable especially for boys' | Relatable |
|  |  |  |
| *p6* | ‘I sort of feel personally I can relate to whenever he sort of thinks "you're always very quiet"' | Relatable |
|  |  |  |
| *p6* | ‘I feel the comic expressed the whole, you know, experience of anxiety and depression quite well actually.' | Relatable |
|  |  |  |
| *p7* | ‘I really like that where he's walking towards the edge of the park and feeling really relieved and like looking forward to the future and then this anxiety, sadness and depression creature comes out of nowhere 'cause that's really what it feels like' | Relatable |
|  |  |  |
| *p7* | ‘"The same old shops…no eye contact, nobody speaks or says hello"…I feel like that's relatable, you know, like it's really east to kind of be…complacent with your surroundings sometimes' | Relatable |
|  |  |  |
| *p8* | ‘The bottom box on that first drawn page…I don't know like it's understandable and…it's like a very common thing…so that's where it's relatable as well' | Relatable |
|  |  |  |
| *p8* | ‘I think it's interesting 'cause quite—with all of the scenarios that have happened so far and the things he's talking about they’re very much relatable in the sense that it can happen to everybody.' | Relatable |
|  |  |  |
| *p8* | ‘I would say it's quite relatable. Em and it's quite nice to read something that is relatable in that, that type of sense of things, like with the whole—that everybody struggles with things and that you have to overcome them, but there are ways that you can overcome them.' | Relatable |
|  |  |  |
| *p9* | ‘I feel like there's definitely a lot of things I can relate to like having like negative thoughts like about myself and like replaying things over.' | Relatable |
|  |  |  |
| *p10* | ‘The whole bit about the "Mental hamster wheel", totally relatable…I think that last bit of the first page has really hit home' | Relatable |
|  |  |  |
| *p10* | ‘The whole second page…he's almost dreaming his way through life, just he's not even taking anything in 'cause he's so caught in his own thoughts…it's quite relatable' | Relatable |
|  |  |  |
| *p10* | ‘I see myself in the character a lot (laughs), just both in terms of eh some of the stuff I've maybe dealt with in the past and even just in looks' | Relatable |
|  |  |  |
| *p11* | ‘I like the, the bags and stuff sitting on top of him like I can relate to that sometimes as well...I definitely think that it, it's good to show that like everyone obviously has parts of this in their life as well' | Relatable |
|  |  |  |
| *p12* | ‘I feel like I relate with this guy when he says that, "Something that happened during your day" and it replays in your mind "over and over again"' | Relatable |
|  |  |  |
| *p12* | ‘When I read the beginning and it's like, things replaying in your head ‘over and over again’  that really like captivated me and I was like this is, this is so true. I know, I know how it feels like.' | Relatable |
|  |  |  |
| *p13* | ‘It did feel a lot like I was just like watching a bit of my own life, if you get us? A lot of the em sort of the thoughts and the feelings and emotions and the train of thought and everything was quite similar.' | Relatable |
|  |  |  |
| *p14* | ‘So here where Sam is sort of experiencing online trolls. I feel it's very real and a very undiscussed part about experiencing social media. Sort of everyone is busy showing off what they have and it affects other people, because that shows that that's the image of success' | Relatable |
|  |  |  |
| *p14* | ‘People you know might even relate to the character in some instances without having to have had depression themselves' | Relatable |
|  |  |  |
| *p15* | ‘Em I thought the story content was em a very good mix of like the ups and downs, I think it's—em goes through it really well and yeah, the kind of you know the actual pattern of mental health problems, it's not like up and then down and then back up. Do you know it’s like that kind of almost rollercoaster' | Relatable |
|  |  |  |
| *p16* | ‘Being someone who's kind of experienced something similar it's kind of really nice to see visual representation of something that at the time I couldn't process or verbalise...you kind of look at it and go that is exactly how I felt.' | Relatable |
|  |  |  |
| *p16* | ‘You feel bad for him when he's talking about feeling trapped. And you can sort of relate to the fact that you would, you would play things over in your mind' | Relatable |
|  |  |  |
| *p18* | ‘The comic really wants me to empathise with this character and see myself in this character’s shoes, which I get...you can relate, you can feel for this character.' | Relatable |
|  |  |  |
| *p18* | ‘Um I sort of went through a depression and um I think it sort of did it justice' | Relatable |
|  |  |  |
| *p19* | ‘I read the next two pages as well. I can, I can relate to these as well,  because like I sometimes overthink as well, like thoughts will go round and round and round in my mind.' | Relatable |
|  |  |  |
| *p20* | ‘”No eye contact, nobody speaks or says hello” when he's walking home, again that's relatable' | Relatable |
|  |  |  |
| *p21* | ‘You know I think what he says here is pretty accurate right now, "I suppose I’ve thought this way so long it's hard to imagine another way. It messes with my sense of what's real." I think I, I can relate to that, and I know my friends with depression can as well.' | Relatable |
|  |  |  |
| *p21* | ‘And the part about like where you think you’ve like made a lot of progress, but everything comes back again, I think that's very real as well…it can be very disheartening.' | Relatable |
|  |  |  |
| *p22* | ‘It is very true also that it does come in waves, you know? You know, sometimes you feel okay and you're not thinking about things too much, but it only takes...like one stray thought you know back to something, and you plummet again.' | Relatable |
|  |  |  |
| *p22* | ‘It's very relatable eh I think you know those feelings of like you know, being worthless and you are the only one dealing with this and you know...people who you thought you were friends not helping you out and you're feeling like a burden to people and then feeling overwhelmed and yeah, there's—very relatable definitely.' | Relatable |
|  |  |  |
| *p23* | ‘I should catch myself on, other people have real reason to feel miserable"…I think that's a common thought process for loads of people' | Relatable |
|  |  |  |
| *p23* | ‘It definitely is a bit relatable like I definitely can get trapped and if...something goes wrong and I have a bad day like I definitely can get trapped in that bit of a "hamster wheel myself".' | Relatable |

| Theme 2 (Connection to Self ) | |  |
| --- | --- | --- |
| *Participant ID* | **Supplementary quotations** | **Code** |
| *p1* | ‘Them all coming together, just it reminds me of conversations with my friends where we all kind of let our guard down a little bit, which always seems kind of scary at first, but I always feel better afterwards anyway' | Reflecting on personal experience |
|  |  |  |
| *p1* | ‘it's just brought up a lot of thoughts of previous experiences…just making me think back to certain experiences…I'm not, you know upset or anything…reminds me of you know past achievements I've had with my own mental health…it's reminded me of em of good experiences' | Reflecting on personal experience |
|  |  |  |
| *p2* | ‘then about the masks you put on every day em I can relate to that as well, 'cause I feel like em in different social situations, it's very easy to act a certain way…when in reality you can have things going on under the surface' | Reflecting on personal experience |
|  |  |  |
| *p2* | ‘For me, I guess I rely on sport, just trying to relate it to me, so like sport does that sort of release in terms of if you've got any like thing like, like you're annoyed at anything…playing sport is what I would depend on I guess' | Reflecting on personal experience |
|  |  |  |
| *p2* | ‘I think it gets you thinking about yourself, the way the story's framed, which means that you're asking questions about how you're feeling and stuff, so no I think it's I think it's really good' | Comic promotes self-reflection |
|  |  |  |
| *p3* | ‘a voice in our head...replaying something over and over in the mind...I really cannot recognise why this happens and this is the point that was mentioned in this story so it made me curious...because it's a question for me, why sometimes we hear sounds why they keep, keep, keep them repeating themselves in our head.' | Comic promotes self-reflection |
|  |  |  |
| *p4* | ‘I think this social media thing is very true as well…I personally try to spend as little time on social media as possible because I feel like sometimes when you spend too much time on social media you start noticing that you don't fit into certain boxes' | Reflecting on personal experience |
|  |  |  |
| *p4* | ‘Hmm, "*Your mind makes things appear real. Fears seem larger, worries take over because your mind makes them behave that way*."  I think when you think about things, like the more you think about things, you magnify them so they become a lot bigger like the more you think about it (*laughs)*, even though it can be a really small thing' | Reflecting on personal experience |
|  |  |  |
| *p6* | ‘I know I can always get a little bit upset in terms of like the slightest inconvenience and, you know, I always kind of berate myself for it in a way, like I kind of think you know others are sort of so much better at like managing their stresses and they’re so much stronger than I am and I'm just kind of, you know, I sort of cry at every inconvenience (*laughs*) 'cause I worry about being that sensitive' | Reflecting on personal experience |
|  |  |  |
| *p6* | ‘at a time when I needed in person contact more than ever, I've never felt so detached from the people in my course…I know my mental health has kind of suffered through this year, again due to the loneliness' | Reflecting on personal experience |
|  |  |  |
| *p6* | ‘it was definitely therapeutic…it definitely was something I think I needed to read at this time…I feel good for actually taking the time to, you know, kind of speak about my own personal experiences…I definitely feel the comic definitely allowed me to reflect on them' | Comic promotes self-reflection |
|  |  |  |
| *p7* | ‘Yeah, I think that's a really good point that it has on, I think, Page, Page 3 where it talks about "*Being alone with our thoughts is difficult enough…the external stresses can be relentless",* I think that's something that—especially this past year with Covid touching everything and like the University going online and it's hard enough dealing with your own private griefs and stresses and anxieties and stuff like that, but having to deal with other people, not just like university in general, but university and its people that run it dealing with Covid' | Reflecting on personal experience |
|  |  |  |
| *p7* | ‘This part about social media, urging us to be part of the group is definitely something I've thought about a lot the past year and a half because, you know, we've only been able to interact via social media for the most part' | Reflecting on personal experience |
|  |  |  |
| *p7* | ‘I know I've used the word relatable a lot, but actually—I don't know if like this is relevant for your study, but I'm comfortable sharing it. I actually have em GAD, so generalized anxiety disorder, so where he's talking about like on the outside, I have all this good stuff to be thankful for, but in my mind like there are these big worries that just go round and round and that, that's something that I again (laughs) relate to like on a daily basis like, definitely it's exhausting.’ | Reflecting on personal experience |
|  |  |  |
| *p8* | ‘There’s quite a nice em—this page I can relate to a lot actually 'cause I do rock climbing  so I know the like the actual physical feeling of climbing up a wall, where it seems almost impossible, you can see the top, but you don't know if you're as he says, I don't know if you're strong enough to do it , but the feeling you get when you have conquered it is like a nice metaphor' | Reflecting on personal experience |
|  |  |  |
| *p10* | ‘Yeah, just like em bottom of the page where he's, he's tied up with the bags again, but he's got the balloons em—the "*Exercise"* in there , I think for me I can personally relate were exercise’s a really good relief. And also the "*Self-hatred"* I think is something that is present in everyone but we, we don't realise we self-hate for such a long time and we're like well, well that’s not self-hatred that’s—and until we kind of give it the name, kind of take-off disguised as something else em then we can’t deal with it, but it is eh yeah, that's relatable.' | Reflecting on personal experience |
|  |  |  |
| *p10* | ‘Oh and the bit about anger where it's saying it fuels you…in the past I have used anger…with sports and things' | Reflecting on personal experience |
|  |  |  |
| *p12* | ‘It's given me so many ideas about myself, I feel that I can apply it to myself' | Comic promotes self-reflection |
|  |  |  |
| *p13* | ‘well most of it related to my experience of like the hopelessness, the everyday would be like feeling the same, and then you feel like you're invisible and all that sort of stuff' | Reflecting on personal experience |
|  |  |  |
| *p14* | ‘So here where the character is talking about replaying situations in their mind. I find myself feeling sad also because I can relate to this as well, replaying people's words and thinking the million different things they might be thinking' | Reflecting on personal experience |
|  |  |  |
| *p14* | ‘I would think it's, it's eye opening in a way, because I was able to relate to many situations in the story and recognise ways where I coped positively with myself in those situations, like how Sam did.' | Comic promotes self-reflection |
|  |  |  |
| *p15* | ‘I don't think that's spoken about enough, like how much you can kind of read into small little daily interactions and the effect it can actually like have on you.' | Comic promotes self-reflection |
|  |  |  |
| *p16* | ‘It's kind of nice and being someone who's kind of experienced something similar it's kind of really nice to see visual representation of something that at the time I couldn't process or verbalise...you kind of look at it and go that is exactly how I felt' | Reflecting on personal experience |
|  |  |  |
| *p18* | ‘I'm a person of faith so, the gaping like—the missing thing here was like faith like um self—it's not self-belief and all that, for me it's about God  so, so yeah. Like God has helped me through really dark moments. Um talking to a priest, going to confession, stuff like that - that's, that's my experience...how I deal with my daily burdens of life.' | Reflecting on personal experience |
|  |  |  |
| *p19* | ‘Oh this part—I really like this part, where he like channels his negative thoughts and negative energy into something more positive, I do that as well. Yeah whenever, whenever I'm tired or whenever I have like negative thoughts or I'm getting homesick or stuff, I will try to think about more positive things - something tasty for dinner, some crafts, maybe some music.' | Reflecting on personal experience |
|  |  |  |
| *p21* | ‘connecting with people with other people is often a good way to start tackling your problems, I think that's a very good point, but I think sometimes if people try to connect with someone and then they don't get the—a response that—you don't get a good response, you get like a bad response then I think it can be very disheartening as well , so yeah...then you feel like, oh, I'm never doing that again.' | Reflecting on personal experience |
|  |  |  |
| *p22* | ‘I think it does kind of bring back memories, I suppose you know of your own experiences and stuff, you know?' | Comic promotes self-reflection |
|  |  |  |
| *p22* | ‘for a long time um eh I—being Indian, you know in a country that's predominantly white, I felt very different, you know growing up and I never looked in a mirror when I was at school, you know, you know when you go to the toilets or whatever, I never looked up, 'cause I didn't want to—if I didn't look up then it wouldn't, kind of em sink in you know that I was so different to everybody else, that was around me you know?' | Reflecting on personal experience |
|  |  |  |
| *p22* | ‘when I was younger I definitely…I can remember saying horrible things to myself, you know? Just kind of, you know, saying, "oh god you're so ugly" or "you're so fat"' | Reflecting on personal experience |
|  |  |  |
| *p23* | ‘if something goes wrong and I have a bad day like I definitely can get trapped in that bit of a hamster wheel myself' | Reflecting on personal experience |
|  |  |  |
| *p23* | ‘that comment there actually definitely hits home with me, that like "other people walk by hearing the birds and the wind in the trees, you hear your own torturous thoughts". Like sometimes I can be in my own head quite a lot…just not be present because I'm that worried about something' | Reflecting on personal experience |
|  |  |  |
| *p23* | ‘Yeah...it’s scary opening up to people, but if you do they, they may be like a similar—like I know my friend was talking to someone yesterday and they actually have like a similar...kind of level of anxiety to them and the fact that that person opened up to them means they now can both talk about it to each other.' | Reflecting on personal experience |
|  |  |  |

| Theme 3 (Understanding and Insight); Subtheme 3.1 (Reflections on mental wellness and recovery) | |  |
| --- | --- | --- |
| *Participant ID* | **Supplementary quotations** | **Code** |
| *p1* | ‘you often need to work through these things on your own...it always helps with other people but...all coping mechanisms and help from others are all steps towards helping yourself eventually' | The role of the self |
|  |  |  |
| *p2* | ‘And I guess then as he realises that this masked person is himself...in a way, I guess that again provides hope because...he’s sort of doing this, he sort of feels like he's doing this to himself but I guess in a way that that also means that the answers are inside him as well' | Can be own worst enemy; the answer is inside us |
|  |  |  |
| *p3* | ‘I found it, it's very useful, very, very much useful story and especially giving me an idea of the reality and how to help myself to avoid bad feelings and more, more importantly to live, to live in present' | Facilitates learning; Importance of living in present |
|  |  |  |
| *p4* | ‘I personally have never had like chronic anxiety or depression, but in reading this I have a greater appreciation of what it must feel like and I can't say I understand 100%, but I have a greater appreciation of what it, what it may feel like to be in that situation' | Facilitates learning; facilitates wider perspective |
|  |  |  |
| *p6* | ‘the whole like you know wanting to help others…sort of being there for other people, it kind of helps other people realise you know the good that is in them because they kind of thought well you know they had this whole kind of self-hatred going on and all it kind of takes is like you know for someone to listen' | Importance of social support |
|  |  |  |
| *p6* | ‘taking little things at a time rather than feeling as if you have to get the problem sorted right away…like rest is as important as you know the work itself' | One step at a time; Self-care important |
|  |  |  |
| *p6* | ‘it's just kind of having the whole understanding and compassion, sort of taking things little by little to kind of understand that you know you can kind of overcome them, you know, if you try' | Self-compassion important; One step at a time |
|  |  |  |
| *p8* | ‘you're learning a bit about em the, subject of having to deal with things...everybody struggles with things...but there are ways that you can overcome them' | Facilitates learning; Problems can be overcome |
|  |  |  |
| *p8* | ‘I think it's interesting that the story wasn't like straightforward…it continues until he like confronts it' | Need to confront problems |
|  |  |  |
| *p9* | ‘Like instead of ignoring all his problems and trying to like block out things, when he like confronted them and talked about them he found them like a lot easier' | Need to confront problems |
|  |  |  |
| *p10* | ‘I think a lot of stuff that we put on ourselves, the stimulus for it isn't someone else...I suppose that relates back to how you darkness was himself.' | The role of the self; Can be our own worst enemy |
|  |  |  |
| *p11* | ‘I liked that he realised that by helping other people, it helped him...that he could bring his own like problems down a bit, I thought that was good' | Helping others, helps us |
|  |  |  |
| *p12* | ‘it's your own thoughts in the end of the day, you know?' | Role of thinking |
|  |  |  |
| *p14* | ‘Sam figures out that the darkness, or the voice, is actually himself,  which I think is a realisation a lot of people don't understand until later, maybe in their journey for mental health that they're not dealing with sort of an external cruel force...you're dealing with yourself and it can make a person be more kind to themselves when they hear those negative thoughts they realise uh that they can actually have a conversation with themselves instead of feeling like it's them receiving the, the negative thoughts from something' | Can be our own worst enemy; The importance of self-compassion; The role of self/thinking |
|  |  |  |
| *p15* | ‘I think it can be packaged up as, oh you follow this, like think this way, eat this way, do this kind of routine then it's almost viewed as something that you just recover from and then don't have to keep maintaining, which is just not the case and it is kind of a, a life-long routine of, of changing your thought patterns, which I don't think is recognised enough.' | Good MH requires ongoing maintenance |
|  |  |  |
| *p16* | ‘That one there's a good point about changing your perspective...if you’re in a negative space and your fixated on one thing, you sort of can't see past your own, your own negative cycle—your own negative thoughts to sort of challenge it or think of solutions.’ | Role of thinking |
|  |  |  |
| *p16* | ‘I liked the fact that it acknowledged so much about mental health…it isn't just one event, or you overcoming one hurdle means you're totally fine. I like the fact that it, it did acknowledge the fact that it's a reoccurring, it's a reoccuring thing that's gonna have to be dealt with over and over again' | Conveys accurate MH journey; Good MH requires ongoing maintenance |
| *p17* | ‘I really like it in the comic it doesn't happen just immediately, it's a gradual stepping up a pathway which shows that any drawbacks do not really, not really actually stop him, actually draw you back, but they're just another stepping stone to getting better eventually' | One step at a time; Conveys accurate MH journey |
|  |  |  |
| *p17* | ‘I think it's really good that it gives an idea…even just talking to a stranger or a friend, it doesn't necessarily have to be therapist you talk to for the first time. Very beneficial, you can go ahead and help you give the first steps' | Talking helps |
|  |  |  |
| *p21* | ‘Yeah I think it makes some good points here in saying that the burden doesn't go away, but it gets lighter. It's a, it's a very gradual process, which I think is very true.' | Good MH requires ongoing maintenance |
|  |  |  |
| *p22* | ‘it made sense, you know, like realising that these thoughts you know are—it's not some demon you know or somebody else telling you this, or even you know social media...it is in your head, you know, rather than em—you know an external thing' | Can be your own worst enemy; Role of the self/thinking |
|  |  |  |
| *p23* | ‘the way it just showed you that it's actually you doing it to yourself…it is me and actually it's been me this whole time, it's not anyone else…it's actually just me that is torturing myself' | Role of the self/thinking |
|  |  |  |
| *p23* | ‘it's not like aw we're just going to banish everything like you're all gonna be cured, it's like okay the thoughts are still there, you might never get rid of them but they're not going to weigh you down like they did and they're more manageable' | Good MH requires ongoing maintenance/ Role of thinking |
|  |  |  |
| *p23* | ‘I think that the key message seems to be here that the burden will become lighter, the burden’s never gonna vanish, but it definitely can become a smaller feature and less of a, less of a turmoil' | Good MH requires ongoing maintenance/ Problems can be overcome |
|  |  |  |

| Theme 3 (Understanding and Insight); Subtheme 3.2 (Learning through the graphical narration and nudges toward support) | | |
| --- | --- | --- |
| *Participant ID* | **Supplementary quotations** | **Code** |
| *p1* | ‘I liked a lot of the kind of metaphors that it was bringing up. Made it quite easy to understand where, where the story was going' | Metaphors aided story comprehension |
|  |  |  |
| *p2* | ‘the yellow boxes are all like meant to like sort of I think make you sort of relate to what's going on in the story, so I think it's a really good experience from that point of view, in terms of putting myself in em the guy’s issues and seeing it from his perspective...reading this story you can think about it from the outside perspective...’ | Narration effective; Facilitates wider perspective |
|  |  |  |
| *p3* | ‘I have found a new idea…Not to let the problems get the better of me as it was the conclusion of this story’ | Comic facilitates learning |
|  |  |  |
| *p4* | ‘I like how, throughout the comic, they keep saying one step at a time, one day at a time...it may be a very general statement, but it's a very practical statement for people who are struggling because sometimes you just try to take it all at once and solve all your problems at once, but when you keep hearing this line, it's like, yeah, you can actually break this down, you can actually just do it one step at a time.' | Narration effective; One step at a time |
|  |  |  |
| *p4* | ‘I like the colours 'cause like when you see the red, you know they're talking about the balloon…when you see the black, you know they’re talking about the dark guy…when you're reading it, it's very easy for you to understand, okay this is talking about this, this is talking about that, you know what I mean?' | Effective imagery symbolism; Images aid comprehension |
|  |  |  |
| *p4* | ‘I think the yellow box is the narration - I found that really nice because it's very relatable and I think if someone was struggling and they read this, they would be able to relate to that and they would be able to identify em with that and find, find help I guess' | Narration effective |
|  |  |  |
| *p6* | ‘Like, even though the, the masked figure kind of gets smaller, you know he's not gone completely like they always are there, like negative thoughts are always there, but it's whether or not you, you kind of like you know—well, I suppose we can't help them, but it's whether or not you choose to give into them' | Effective imagery symbolism; The role of the self |
|  |  |  |
| *p7* | ‘It's easier to be positively judgmental when you're reading it…*"I didn't know what to say. He must think I'm stupid"*, like when I'm reading this and it's someone else I'm like that's ridiculous like you don't need to jump like that just chill, but when it's me that's a totally rational line of thinking.' | Narrative effective; Facilitates wider perspective |
|  |  |  |
| *p7* | ‘I like the yellow banner commentary, I think it runs really well alongside what he's thinking and talking about, again kind of like—it's relatable enough, like you know that you're thinking this way, but you also know it's wrong, but you also can't stop, but you know—I like having that. Like those two voices next to each other...it's a little bit more validating 'cause, rather than just having a comic of someone who's just having a crappy day, you also have a narrator that illustrates like what is actually going on.' | Narration effective; Facilitates wider perspective |
|  |  |  |
| *p7* | ‘The trees remind me like, like you know that you're being hard on yourself, but then you beat yourself up for being hard on yourself…it makes me think about how like you can have all these conflicting thoughts…I think it illustrates that very well' | Effective imagery symbolism; Metaphors aid comprehension |
|  |  |  |
| *p8* | ‘So when it starts talking with the, the yellow boxes, I think that's quite interesting…it's like a narrative…yeah it's like if you had a narrator for a story…it's almost like a communication on what's going on…it's explaining everything that's happening, gives more insight into it' | Narration effective |
|  |  |  |
| *p10* | ‘The girl is tangled up in her thoughts em I think the picture’s very like spot on...you're trying to do three or four things at once...if you just take one at a time you’d be fine, but she's obviously trying to deal with it all and got tangled up and then she can’t help anyone.' | Visual metaphor aids understanding |
| *p11* | ‘I think it's a, a good way to portray that kind of stuff and I really liked the wee em tickets that like the text was in for like the tips on how to deal with things.' | Narration effective; Facilitates learning |
|  |  |  |
| *p12* | ‘I think comics is a really good way to like, simplify and help people you know understand better' | Facilitates learning |
|  |  |  |
| *p13* | ‘I think it's quite effective because it would like—it does like capture your interest  and it makes it a lot easier to sort of see it like all like drawn out, if you get us? Instead of just like reading the words because it gives you a more of a personal feel...and also if you haven't experienced certain things before seeing it sort of drawn out like metaphorically can sort of help you understand' | Visual metaphors aid understanding |
|  |  |  |
| *p14* | ‘The comic was able to represent many complex thoughts and experiences that a person may have in quite simple depictions of language.' | Narrative/ narration effective |
|  |  |  |
| *p14* | ‘I think the story content is very easy to understand and easy to digest and I don't think it would be very difficult for anyone of any background to read this comic and understand what it's about and what it’s trying to deliver.' | Narrative/ narration effective; Facilitates understanding |
|  |  |  |
| *p17* | ‘I feel like there are a lot of layers in it, and I think it's really good because then whoever is reading it can pick the layer and the information they need and take it from there and use it to help themselves...some people may just have, like very light struggles in life or don't know how to deal with certain situations, and they can pick up solutions for that here, but there are also people with deeper issues with being very hard on themselves and trying to be their best selves all the time and they also can see that—what this can lead to and how they can help themselves and I think that's really beneficial.' | Layers of meaning; Facilitates learning |
|  |  |  |
| *p18* | ‘His inner demons, they're literally demons - which I get' | Visual metaphors aid understanding |
|  |  |  |
| *p20* | ‘Like actually seeing the pictures and reading the stuff it’s—especially like short sentences, like it helps get the message across better than like actually having to read books and do research and stuff, so yeah I think it's quite effective' | Combination of visuals and narrative |
|  |  |  |
| *p21* | ‘I still think that the comic is a really good way to, to educate people on this matter because like I said, I think the visual element of it really, really helps…seeing it in a visual form is, is really, really very helpful.’ | Facilitates learning about MH; Visuals effective |
|  |  |  |
| *p22* | ‘Because it's images, I think it's a lot easier to relate to than just like a whole load of text saying this is what you're feeling, this is how you can deal with it, you know, kind of instructional, you know, NHS leaflets - I don't think they work as well' | Visuals effective; facilitates learning |
|  |  |  |
| *p23* | ‘Aw so it's like her being tangled up in her thoughts, is like a metaphor for what he's feeling…she's almost like a visual representation of him, he's got so tangled up in his head and now he's seeing someone who's literally tangled up' | Visual metaphor aids comprehension |
|  |  |  |
